# Supplementary material for: Effects of nitrogen application rate, nitrogen synergist and biochar on nitrous oxide emissions from vegetable field in south China
Source: PLoS One. 2017 Apr 18;12(4):e0175325. doi: 10.1371/journal.pone.0175325 (PMC5395173; doi:10.1371/journal.pone.0175325)
Supplement: S1 Fig — (XLSX) [file pone.0175325.s001.xlsx]

## Sheet: Climate
Date	Average daily T （℃）	Precipitation（mm）	sampling Date	Air T in chamber
2015-04-29	25.7	1	2015-05-04	35.2625
2015-04-30	26.2	12.8	2015-05-08	35.0875
2015-05-01	26.5	12.1	2015-05-15	33.0125
2015-05-02	27	0	2015-05-19	33.375
2015-05-03	27.3	38	2015-05-22	25
2015-05-04	27.8	2.4	2015-05-29	34.5625
2015-05-05	25.6	103.1	2015-06-02	33.125
2015-05-06	24.6	44.1	2015-06-05	30.4125
2015-05-07	24.9	139.4	2015-06-12	32.8125
2015-05-08	26.7	3.9	2015-06-17	34.1
2015-05-09	25	37.4
2015-05-10	24.8	0	2015-09-30	32.7667
2015-05-11	24.8	44.5	2015-10-06	28.5
2015-05-12	23.5	0	2015-10-09	32.2917
2015-05-13	24.8	0	2015-10-13	30.775
2015-05-14	27.2	0	2015-10-16	28.0625
2015-05-15	27.9	0	2015-10-20	28.75
2015-05-16	24.2	40.4	2015-10-23	28.9125
2015-05-17	24.3	47.5	2015-10-27	28.0625
2015-05-18	26.7	2.1	2015-10-30	29.8125
2015-05-19	27.8	0.1	2015-11-03	22.9375
2015-05-20	25.5	63.2	2015-11-06	27.0625
2015-05-21	23.8	43.8	2015-11-10	23.525
2015-05-22	22.5	8	2015-11-23	25.5
2015-05-23	23.2	28.1
2015-05-24	24.8	15.4	2015-12-04	15.3125
2015-05-25	26.5	30.7	2015-12-08	14.9375
2015-05-26	26	22.6	2015-12-11	22.625
2015-05-27	28	0	2015-12-15	16.4
2015-05-28	29.5	0.1	2015-12-18	12.6
2015-05-29	29.9	0	2015-12-22	20.725
2015-05-30	27.5	54.1	2015-12-25	15.3125
2015-05-31	24.2	24.6	2015-12-30	14.85
2015-06-01	25.5	28.8	2016-01-07	26.9
2015-06-02	29.2	1.7	2016-01-11	20.25
2015-06-03	29.8	0	2016-01-14	15.0625
2015-06-04	28.9	19	2016-01-20	14.5
2015-06-05	26.6	40.8	2016-01-29	18.375
2015-06-06	26.3	1.6	2016-02-02	10.475
2015-06-07	27.9	0	2016-02-10	21.8667
2015-06-08	28.6	6	2016-02-17	15.4333
2015-06-09	29.1	0.5
2015-06-10	27.7	15	2016-03-16	16.4375
2015-06-11	28	25.4	2016-03-18	19.975
2015-06-12	26.4	15.9	2016-03-25	16.5833
2015-06-13	27.4	17.3	2016-03-29	23.025
2015-06-14	26.9	10.7	2016-04-01	24.7375
2015-06-15	28.2	6.4	2016-04-06	25.3583
2015-06-16	28.7	1.5	2016-04-08	30.375
2015-06-17	29.7	0	2016-04-12	24.5
2015-06-18	30.3	0	2016-04-15	26.025
2015-06-19	30.3	0	2016-04-21	25.75
2015-06-20	30.9	0	2016-04-25	29.5625
2015-06-21	27.2	10.9	2016-04-29	31.9833
2015-06-22	27.5	17.8	2016-05-04	28.675
2015-06-23	26.8	11.2	2016-05-12	28.375
2015-06-24	26.6	13.7	2016-05-17	26.2917
2015-06-25	29.1	2.2	2016-05-24	29.6875
2015-06-26	30.3	5.2	2016-05-31	35.3875
2015-06-27	30.1	0.2
2015-06-28	30.1	0
2015-06-29	30.3	0
2015-06-30	30.7	0
2015-07-01	30.8	0
2015-07-02	31	0
2015-07-03	30.8	0
2015-07-04	30.4	0
2015-07-05	28.3	16.1
2015-07-06	26.8	0
2015-07-07	27.5	0
2015-07-08	26.7	0
2015-07-09	25.6	3.3
2015-07-10	27.8	59
2015-07-11	28.9	0
2015-07-12	29.3	0
2015-07-13	30.7	0
2015-07-14	30.3	0
2015-07-15	30.7	0
2015-07-16	27.3	102.5
2015-07-17	27.6	31.9
2015-07-18	28.1	126.1
2015-07-19	28.8	12.5
2015-07-20	27.6	13.2
2015-07-21	25.8	33.8
2015-07-22	27.5	0
2015-07-23	27.4	6.8
2015-07-24	26.6	4.7
2015-07-25	27	0.1
2015-07-26	27.8	6.4
2015-07-27	26.1	17
2015-07-28	27.4	0
2015-07-29	26.2	0
2015-07-30	27	7.8
2015-07-31	28.1	0
2015-08-01	27.5	0
2015-08-02	28.2	0
2015-08-03	27.6	0
2015-08-04	28.5	0
2015-08-05	28.5	0
2015-08-06	29.2	0
2015-08-07	29.6	0
2015-08-08	30.3	0
2015-08-09	29.7	0
2015-08-10	27.7	13.3
2015-08-11	25.7	92.1
2015-08-12	29	10.3
2015-08-13	27.3	23.6
2015-08-14	25.3	73.6
2015-08-15	25.4	15.4
2015-08-16	27	0
2015-08-17	28.6	0.4
2015-08-18	29.7	0
2015-08-19	30.5	0
2015-08-20	27.7	39.9
2015-08-21	28.9	0
2015-08-22	28.8	0
2015-08-23	29	0
2015-08-24	28.9	0
2015-08-25	27.5	0
2015-08-26	28.4	0
2015-08-27	28.5	0
2015-08-28	26.7	4.1
2015-08-29	25	35.1
2015-08-30	25.5	25.2
2015-08-31	25.5	9.7
2015-09-01	25.8	11.7
2015-09-02	25.2	41.3
2015-09-03	26	3.1
2015-09-04	28.3	0
2015-09-05	28.8	0
2015-09-06	29.2	0
2015-09-07	25.9	30.9
2015-09-08	26.9	0
2015-09-09	26.9	0
2015-09-10	27.4	0
2015-09-11	27.6	0
2015-09-12	26.6	1.6
2015-09-13	25.1	0
2015-09-14	25	0
2015-09-15	26.1	0
2015-09-16	26	0.3
2015-09-17	27.1	0.1
2015-09-18	27.2	0
2015-09-19	28.2	0
2015-09-20	27.5	4.8
2015-09-21	23.9	21.9
2015-09-22	26.5	0.7
2015-09-23	27.7	0
2015-09-24	28.1	0
2015-09-25	28.1	0
2015-09-26	28.2	0
2015-09-27	27.3	0
2015-09-28	26.1	0
2015-09-29	27.7	0
2015-09-30	26.9	0
2015-10-01	28	0
2015-10-02	26.1	0
2015-10-03	25.7	0
2015-10-04	24.5	57.3
2015-10-05	25.2	24.9
2015-10-06	25.2	4.7
2015-10-07	25.2	31.9
2015-10-08	25.6	0.7
2015-10-09	24.4	0
2015-10-10	20.6	1
2015-10-11	17.3	1
2015-10-12	20.9	0
2015-10-13	22.8	0
2015-10-14	23	0
2015-10-15	22.5	0
2015-10-16	22.7	0
2015-10-17	21.9	0
2015-10-18	21.7	0
2015-10-19	21.2	0
2015-10-20	22.4	0
2015-10-21	23	0
2015-10-22	24.1	0
2015-10-23	23.8	0
2015-10-24	23.4	0
2015-10-25	24.4	0.1
2015-10-26	24.4	0
2015-10-27	24.2	0.1
2015-10-28	25.4	0
2015-10-29	25.1	0.4
2015-10-30	24.2	0.9
2015-10-31	21.6	0
2015-11-01	17.6	0.4
2015-11-02	17.7	0
2015-11-03	19.4	0
2015-11-04	21.7	0
2015-11-05	24.4	0
2015-11-06	24.7	0.2
2015-11-07	24.5	1.4
2015-11-08	25.1	1
2015-11-09	23.6	0
2015-11-10	20.5	0
2015-11-11	21.8	0
2015-11-12	21.6	0.3
2015-11-13	17.8	40.9
2015-11-14	20.2	0
2015-11-15	23.2	0.5
2015-11-16	24.4	0
2015-11-17	24.5	0
2015-11-18	24.1	0
2015-11-19	23.5	0
2015-11-20	23.7	0
2015-11-21	22.8	0
2015-11-22	23.3	0
2015-11-23	22.1	0
2015-11-24	21.2	0
2015-11-25	18.2	0
2015-11-26	14	0
2015-11-27	12.8	0
2015-11-28	15.1	0
2015-11-29	18.2	0
2015-11-30	18.7	0
2015-12-01	20.1	0
2015-12-02	20.6	0
2015-12-03	14.1	17.6
2015-12-04	13.7	7.5
2015-12-05	12.8	10.9
2015-12-06	12	5.9
2015-12-07	12.7	0
2015-12-08	12.8	0
2015-12-09	13.4	38.6
2015-12-10	16.5	2.4
2015-12-11	16.5	0
2015-12-12	16.8	0
2015-12-13	19.5	0
2015-12-14	16.2	3.7
2015-12-15	15.2	0
2015-12-16	12.5	0
2015-12-17	10.1	0
2015-12-18	9.2	0
2015-12-19	10.6	0
2015-12-20	15.2	0
2015-12-21	15.9	1.3
2015-12-22	18.1	0.7
2015-12-23	20.9	0
2015-12-24	21.4	2.1
2015-12-25	14.7	2
2015-12-26	11.7	0.9
2015-12-27	13.9	8.9
2015-12-28	14.3	0
2015-12-29	14	0
2015-12-30	13.3	3.6
2015-12-31	14.7	0
2016-01-01	14.7	0
2016-01-02	16.9	0
2016-01-03	19.6	0
2016-01-04	20.8	0
2016-01-05	19.5	120.7
2016-01-06	18.1	0
2016-01-07	15.5	0
2016-01-08	15.4	0
2016-01-09	15.4	0
2016-01-10	16.1	9.8
2016-01-11	14.8	20.3
2016-01-12	14.4	0
2016-01-13	13.1	0
2016-01-14	12.1	2.5
2016-01-15	12.1	22.3
2016-01-16	13.7	2.5
2016-01-17	15.7	12.3
2016-01-18	12.7	0
2016-01-19	12.9	0
2016-01-20	12.7	4.8
2016-01-21	11.9	4.5
2016-01-22	8.4	1.6
2016-01-23	5.7	6
2016-01-24	3.4	4.8
2016-01-25	5.1	0
2016-01-26	5.9	7.8
2016-01-27	8.5	32.5
2016-01-28	13.7	91.5
2016-01-29	16.7	61.3
2016-01-30	14.4	0
2016-01-31	13.1	5
2016-02-01	8.4	21.5
2016-02-02	7.5	0.4
2016-02-03	8.3	0
2016-02-04	11.7	0
2016-02-05	11.2	0
2016-02-06	11.9	0
2016-02-07	9.4	0
2016-02-08	9.8	0
2016-02-09	11.3	0
2016-02-10	14.6	0.6
2016-02-11	17.4	0.5
2016-02-12	21.2	0
2016-02-13	22.6	0
2016-02-14	17.8	0
2016-02-15	10.1	0
2016-02-16	9.1	0
2016-02-17	10.9	0
2016-02-18	12.7	0
2016-02-19	12.3	14.4
2016-02-20	14.3	0.5
2016-02-21	13	0
2016-02-22	12.4	2.2
2016-02-23	11.9	0.4
2016-02-24	11.4	0
2016-02-25	10.8	0.3
2016-02-26	11.1	1
2016-02-27	12.7	0
2016-02-28	12.5	0
2016-02-29	14.8	0
2016-03-01	14.7	0
2016-03-02	14.4	0
2016-03-03	15.1	0
2016-03-04	17.5	0
2016-03-05	19.5	0
2016-03-06	20.4	0
2016-03-07	19.9	0
2016-03-08	21.1	0
2016-03-09	19.5	31.7
2016-03-10	9.8	32.8
2016-03-11	8.4	0
2016-03-12	9.7	0.5
2016-03-13	12.5	7.3
2016-03-14	14.1	0
2016-03-15	13.5	0.1
2016-03-16	13.7	1.1
2016-03-17	16.2	5.1
2016-03-18	20	4.2
2016-03-19	22.2	2.7
2016-03-20	21.5	0
2016-03-21	18.3	92.9
2016-03-22	18.1	21.6
2016-03-23	19.6	45.6
2016-03-24	14.8	6.9
2016-03-25	13.6	1.3
2016-03-26	14.4	0
2016-03-27	15.3	0
2016-03-28	14.4	0
2016-03-29	17.2	0
2016-03-30	19.4	0
2016-03-31	22	0
2016-04-01	23.2	0
2016-04-02	23.2	0
2016-04-03	22.7	0.1
2016-04-04	21.5	16.9
2016-04-05	21.8	0.1
2016-04-06	24.1	0
2016-04-07	24.7	0
2016-04-08	25.2	0
2016-04-09	24.2	18.7
2016-04-10	22.1	25.1
2016-04-11	23.1	0
2016-04-12	21.2	33.4
2016-04-13	22.5	9.2
2016-04-14	23.2	7.8
2016-04-15	23.7	3.2
2016-04-16	24.9	0
2016-04-17	25.8	0
2016-04-18	20.6	39.3
2016-04-19	21.3	1.5
2016-04-20	22	10.6
2016-04-21	23.1	9.1
2016-04-22	22.2	13.9
2016-04-23	23.4	2
2016-04-24	24.2	20.3
2016-04-25	25.7	2.1
2016-04-26	25.7	2.2
2016-04-27	25.7	45.7
2016-04-28	25.4	0
2016-04-29	24.7	0
2016-04-30	22	11.4
2016-05-01	22.6	3.3
2016-05-02	25.6	0.2
2016-05-03	25.4	11.6
2016-05-04	25	0
2016-05-05	27.5	3.1
2016-05-06	26.6	20.1
2016-05-07	26.1	4
2016-05-08	27.7	0
2016-05-09	27	0.8
2016-05-10	23.7	104.5
2016-05-11	24.1	0
2016-05-12	25.5	0
2016-05-13	26.6	0
2016-05-14	26.5	0
2016-05-15	25.5	27.7
2016-05-16	21.8	0.1
2016-05-17	22.2	0
2016-05-18	24.4	0
2016-05-19	25.8	0
2016-05-20	24.4	31.9
2016-05-21	25.6	8.3
2016-05-22	25.8	0
2016-05-23	26.1	0
2016-05-24	26.8	0
2016-05-25	28.7	0
2016-05-26	27.8	6.8
2016-05-27	27.1	6.6
2016-05-28	25.6	28.2
2016-05-29	26	35
2016-05-30	27.5	5.3
2016-05-31	29.2	0
