# Supplementary material for: Effects of nitrogen application rate, nitrogen synergist and biochar on nitrous oxide emissions from vegetable field in south China
Source: PLoS One. 2017 Apr 18;12(4):e0175325. doi: 10.1371/journal.pone.0175325 (PMC5395173; doi:10.1371/journal.pone.0175325)
Supplement: S2 Fig — (XLSX) [file pone.0175325.s002.xlsx]

## Sheet: N2O emission
N2O emissions
	2015-05-04	2015-05-08	2015-05-15	2015-05-19	2015-05-22	2015-05-29	2015-06-02	2015-06-05	2015-06-12	2015-06-17	2015-09-30	2015-10-06	2015-10-09	2015-10-13	2015-10-16	2015-10-20	2015-10-23	2015-10-27	2015-10-30	2015-11-03	2015-11-06	2015-11-10	2015-11-23	2015-12-04	2015-12-08	2015-12-11	2015-12-15	2015-12-18	2015-12-22	2015-12-25	2015-12-30	2016-01-07	2016-01-11	2016-01-14	2016-01-20	2016-01-29	2016-02-02	2016-02-10	2016-02-17	2016-03-16	2016-03-18	2016-03-25	2016-03-29	2016-04-01	2016-04-06	2016-04-08	2016-04-12	2016-04-15	2016-04-21
N0	382.303	786.172	478.132	138.279	196.283	1263.96	273.829	143.432	44.3501	65.845	47.2588	15.1408	61.7105	1.97623	14.1373	9.15493	-0.217344	2.17648	-1.80623	4.29421	4.49917	7.42681	6.64849	21.4895	24.9955	32.2579	11.6271	9.35884	15.401	8.1496	9.07414	2.74293	5.57155	6.78788	3.95242	-0.0091539	-1.8657	3.56171	12.2996	8.88363	38.0823	24.5912	4.60792	2.03499	26.1357	9.24835	116.604	189.235	72.7438
N1	744.151	900.792	1559.17	1095.07	395.639	2726.33	1333.28	483.564	118.156	263.37	77.3599	14.1273	461.282	37.9897	-15.3157	282.589	212.129	90.9585	25.9846	40.196	81.3943	21.1933	32.1111	101.562	113.148	149.617	123.283	9.95267	210.44	149.597	243.985	169.882	54.5919	19.2088	14.9282	5.77849	0.32188	29.2154	22.2384	49.5069	399.744	122.948	26.5525	49.8378	168.353	295.745	1183.2	2472.04	1928.99
N2	1847.95	1111.79	2172.36	2796.52	1166.82	4097.84	3649.89	957.84	237.746	471.151	113.958	120.902	913.301	27.0683	40.4988	428.364	559.306	397.81	124.35	69.3033	353.424	105.928	81.9457	185.339	302.385	218.357	156.315	42.842	241.816	452.22	569.144	545.961	575.257	410.362	148.723	34.6521	26.1902	21.7369	23.3191	130.076	632.319	293.959	93.1783	87.3399	257.126	409.87	1859.83	3763.79	2974.65
N3	1731.92	1477.35	1906.59	2927.87	1203.37	5157.29	4725.31	1556.37	315.495	589.256	82.9893	952.27	2777.79	127.66	4.60667	794.706	748.029	503.037	392.352	125.486	589.123	401.083	105.742	342.512	492.168	472.848	312.101	110.967	593.981	518.935	574.736	2070.59	744.907	1233.52	590.482	86.3305	110.728	9.36952	38.0933	232.03	766.514	517.443	352.703	371.15	648.688	1061.87	2402.04	4131.56	3375.48
Standard error	2015-05-04	2015-05-08	2015-05-15	2015-05-19	2015-05-22	2015-05-29	2015-06-02	2015-06-05	2015-06-12	2015-06-17	2015-09-30	2015-10-06	2015-10-09	2015-10-13	2015-10-16	2015-10-20	2015-10-23	2015-10-27	2015-10-30	2015-11-03	2015-11-06	2015-11-10	2015-11-23	2015-12-04	2015-12-08	2015-12-11	2015-12-15	2015-12-18	2015-12-22	2015-12-25	2015-12-30	2016-01-07	2016-01-11	2016-01-14	2016-01-20	2016-01-29	2016-02-02	2016-02-10	2016-02-17	2016-03-16	2016-03-18	2016-03-25	2016-03-29	2016-04-01	2016-04-06	2016-04-08	2016-04-12	2016-04-15	2016-04-21
N0	99.8389	307.161	196.791	87.9453	18.711	539.642	134.195	129.67	22.6315	11.1166	0	0.417552	20.3353	0.371727	4.07159	2.58383	8.74407	2.18588	3.27108	2.81082	1.58484	4.86702	0.600757	8.55382	17.5342	11.932	2.58111	5.7477	4.46002	3.53962	4.60684	0.251198	1.38485	1.29957	3.45508	1.84981	2.02298	3.37077	3.97516	4.27578	7.80075	13.7863	3.86031	3.63126	10.3546	2.03059	31.8176	44.9686	10.1918
N1	56.5904	115.227	116.532	135.362	47.6492	992.9	383.164	336.687	23.3643	101.93	27.7005	26.4978	169.176	8.16535	13.7863	34.6992	157.832	24.4588	9.74026	6.64035	9.50637	3.89618	4.47861	52.9324	24.2403	61.5225	51.5774	1.90669	77.4697	23.49	46.4498	10.8238	9.72761	1.69408	4.14891	2.02366	1.05236	10.9518	8.45015	2.79722	86.6035	33.3211	11.2705	26.9099	48.8002	14.4677	150.659	442.711	244.943
N2	261.836	443.753	14.8788	531.151	116.102	1160.65	1480.05	434.24	133.518	148.054	8.01753	27.1632	38.5077	3.02151	1.67426	177.284	259.376	160.214	71.7756	34.6327	186.522	65.1904	18.078	38.8904	10.9059	44.3161	53.9808	20.0242	63.2755	92.0637	84.6836	149.368	94.1286	90.9794	32.5128	6.31677	5.53953	1.19666	4.79189	19.02	119.971	3.70121	4.89023	15.6489	58.2937	1.09164	121.009	597.867	147.823
N3	241.283	93.475	181.616	131.163	0	1784.11	777.073	182.993	334.26	144.517	17.528	0	349.272	51.4342	30.6986	75.5198	201.23	220.516	184.085	38.0439	153.942	7.06267	4.62124	122.103	108.01	34.1821	45.0452	29.2967	176.743	139.666	72.926	353.097	85.0489	130.267	107.529	22.8577	44.4573	2.48858	0.970447	34.0031	157.714	98.114	106.117	114.954	204.308	118.41	461.903	419.753	336.102
[truncated: 7 more columns]
