# Supplementary material for: Effects of nitrogen application rate, nitrogen synergist and biochar on nitrous oxide emissions from vegetable field in south China
Source: PLoS One. 2017 Apr 18;12(4):e0175325. doi: 10.1371/journal.pone.0175325 (PMC5395173; doi:10.1371/journal.pone.0175325)
Supplement: S3 Fig — (XLSX) [file pone.0175325.s003.xlsx]

## Sheet: cumulative N2O emission
Cumulative N2O emisssion
Endive												Standard error
	2015-05-04	2015-05-08	2015-05-15	2015-05-19	2015-05-22	2015-05-29	2015-06-02	2015-06-05	2015-06-12	2015-06-17		2015-05-04	2015-05-08	2015-05-15	2015-05-19	2015-05-22	2015-05-29	2015-06-02	2015-06-05	2015-06-12	2015-06-17
N0	0.0917526	0.701085	1.72614	2.01748	2.15938	3.5141	4.13343	4.26799	4.41384	4.48254		0.0239613	0.221818	0.522769	0.565564	0.563848	0.797274	0.933414	0.970643	1.04367	1.04561
N1	0.178596	0.986966	3.13234	4.35068	4.80341	7.70554	9.48699	10.0391	10.5205	10.7768		0.0135817	0.0366784	0.186867	0.302835	0.345936	1.31629	1.90174	1.9817	1.95695	1.94807
N2	0.443509	1.77585	4.6618	7.12176	8.353	13.127	16.7922	18.1279	19.0458	19.4992		0.044435	0.163924	0.38109	0.541912	0.661194	0.709853	0.220228	0.413183	0.591083	0.443623
N3	0.41566	1.92556	4.81958	7.26268	8.54298	14.3604	19.0522	20.9334	22.6657	23.387		0.057908	0.157793	0.0285934	0.0769457	0.0948332	1.29224	1.93961	1.98516	1.76127	1.7854
Lettuce															Standard error
	2015-09-30	2015-10-06	2015-10-09	2015-10-13	2015-10-16	2015-10-20	2015-10-23	2015-10-27	2015-10-30	2015-11-03	2015-11-06	2015-11-10	2015-11-23		2015-09-30	2015-10-06	2015-10-09	2015-10-13	2015-10-16	2015-10-20	2015-10-23	2015-10-27	2015-10-30	2015-11-03	2015-11-06	2015-11-10	2015-11-23
N0	0.0113421	0.0524157	0.0856705	0.109072	0.116332	0.126915	0.13508	0.143143	0.144259	0.146198	0.150719	0.157911	0.179776		0	0.000248014	0.00994395	0.0172376	0.0163892	0.017242	0.014445	0.0118056	0.0102326	0.0107278	0.0117148	0.0148828	0.0218869
N1	0.0185664	0.0768493	0.301655	0.49051	0.492276	0.656316	0.825959	0.956901	0.991203	1.02468	1.07339	1.11541	1.19987		0.00470093	0.0164533	0.0903675	0.155688	0.151029	0.165872	0.152856	0.159985	0.163803	0.165719	0.170072	0.174921	0.180325
N2	0.02735	0.197283	0.664683	1.00971	1.03565	1.30725	1.67852	2.11856	2.27372	2.36007	2.54634	2.73713	3.02734		0.00136062	0.0208963	0.112392	0.21274	0.21423	0.238195	0.346413	0.515212	0.579621	0.617438	0.707151	0.801932	0.869789
N3	0.0199174	0.869618	2.4315	3.5081	3.54095	4.01943	4.56922	5.14033	5.44939	5.66593	5.97882	6.43156	7.18676		0.00297461	0.39762	0.632748	0.690801	0.671509	0.656549	0.57793	0.50214	0.514922	0.552202	0.621878	0.755721	0.973103
Cabbage																		Standard error
	2015-12-04	2015-12-08	2015-12-11	2015-12-15	2015-12-18	2015-12-22	2015-12-25	2015-12-30	2016-01-07	2016-01-11	2016-01-14	2016-01-20	2016-01-29	2016-02-02	2016-02-10	2016-02-17		2015-12-04	2015-12-08	2015-12-11	2015-12-15	2015-12-18	2015-12-22	2015-12-25	2015-12-30	2016-01-07	2016-01-11	2016-01-14	2016-01-20	2016-01-29	2016-02-02	2016-02-10	2016-02-17
N0	0.00431938	0.0187863	0.0337609	0.0485835	0.0569312	0.0707848	0.0788719	0.0909191	0.102953	0.107813	0.112907	0.12067	0.124912	0.124327	0.127166	0.14281		0.000838099	0.00504701	0.00864469	0.0106037	0.0108422	0.0129431	0.0148982	0.0183556	0.0213766	0.0216934	0.0213291	0.0187984	0.0145587	0.0148436	0.0137231	0.014991
N1	0.0191886	0.119947	0.201342	0.294136	0.320339	0.447526	0.5693	0.808062	1.19219	1.28449	1.3051	1.32891	1.3509	1.35317	1.3847	1.42505		0.0051863	0.0248185	0.0267376	0.0357178	0.0396711	0.044905	0.0671349	0.106199	0.134199	0.133712	0.133791	0.130628	0.125825	0.125725	0.118699	0.107108
N2	0.0406708	0.280091	0.451144	0.600312	0.644246	0.815079	1.06759	1.64092	2.61374	3.13349	3.44152	3.77891	3.96176	3.98728	4.02967	4.07077		0.00381047	0.0092763	0.0165254	0.0253825	0.0295842	0.0462615	0.0541445	0.0618266	0.130314	0.177406	0.210704	0.252447	0.264963	0.264176	0.264646	0.263494
N3	0.0652839	0.432053	0.75986	1.10401	1.22008	1.59416	1.93819	2.5362	5.22775	6.4201	7.1557	8.34774	9.01171	9.11225	9.22233	9.26564		0.016919	0.0687546	0.0762094	0.0963375	0.111957	0.0669148	0.114193	0.181787	0.164106	0.198924	0.182199	0.17675	0.209498	0.227211	0.247226	0.245868
Sweet corn																			Standard error
	2016-03-16	2016-03-18	2016-03-25	2016-03-29	2016-04-01	2016-04-06	2016-04-08	2016-04-12	2016-04-15	2016-04-21	2016-04-25	2016-04-29	2016-05-04	2016-05-12	2016-05-17	2016-05-24	2016-05-31		2016-03-16	2016-03-18	2016-03-25	2016-03-29	2016-04-01	2016-04-06	2016-04-08	2016-04-12	2016-04-15	2016-04-21	2016-04-25	2016-04-29	2016-05-04	2016-05-12	2016-05-17	2016-05-24	2016-05-31
N0	0.00213207	0.0169077	0.0679346	0.0795521	0.0816348	0.101429	0.107895	0.181187	0.300004	0.47465	0.558822	0.639432	0.691895	0.725826	0.746636	0.76423	0.772764		0.00102619	0.00328527	0.00546146	0.0121443	0.0146657	0.018549	0.019402	0.0366718	0.0654941	0.0951857	0.120972	0.176265	0.216178	0.224291	0.225284	0.227964	0.228768
N1	0.0118817	0.16173	0.567576	0.627768	0.658063	0.8032	0.92987	1.74626	3.21681	6.38991	9.6916	12.9959	15.5711	18.2115	18.8011	18.8314	18.855		0.000671332	0.0319219	0.101652	0.106025	0.118491	0.164644	0.169705	0.235171	0.415873	0.602893	0.946539	1.21466	1.54583	2.1749	2.36567	2.3772	2.37856
N2	0.0312182	0.274462	1.01193	1.17367	1.23795	1.46501	1.64341	2.90687	5.15985	9.91683	14.8817	20.155	24.6832	31.1876	33.7997	34.8218	36.2177		0.00456481	0.040416	0.12899	0.130914	0.133336	0.171182	0.177179	0.196031	0.274385	0.481141	0.635745	0.715742	0.878052	0.938441	0.850535	0.888362	1.11526
N3	0.0556871	0.359476	1.40811	1.80601	2.06881	2.71402	3.17414	4.99763	7.55727	12.8716	18.1399	25.1476	32.1085	40.7188	44.2236	46.4741	49.4989		0.00816075	0.0678549	0.162053	0.181802	0.226307	0.36359	0.495999	0.884353	0.831476	0.51621	1.00024	1.06787	0.187434	0.844094	0.950506	1.11212	1.07136
