# Supplementary material for: Effects of nitrogen application rate, nitrogen synergist and biochar on nitrous oxide emissions from vegetable field in south China
Source: PLoS One. 2017 Apr 18;12(4):e0175325. doi: 10.1371/journal.pone.0175325 (PMC5395173; doi:10.1371/journal.pone.0175325)
Supplement: S4 Fig — (XLSX) [file pone.0175325.s004.xlsx]

## Sheet: N2O emission
N2O emission
	2015-05-04	2015-05-08	2015-05-15	2015-05-19	2015-05-22	2015-05-29	2015-06-02	2015-06-05	2015-06-12	2015-06-17	2015-09-30	2015-10-06	2015-10-09	2015-10-13	2015-10-16	2015-10-20	2015-10-23	2015-10-27	2015-10-30	2015-11-03	2015-11-06	2015-11-10	2015-11-23	2015-12-04	2015-12-08	2015-12-11	2015-12-15	2015-12-18	2015-12-22	2015-12-25	2015-12-30	2016-01-07	2016-01-11	2016-01-14	2016-01-20	2016-01-29	2016-02-02	2016-02-10	2016-02-17	2016-03-16	2016-03-18	2016-03-25	2016-03-29	2016-04-01	2016-04-06	2016-04-08	2016-04-12	2016-04-15	2016-04-21
N0	382.303	786.172	478.132	138.279	196.283	1263.96	273.829	143.432	44.3501	65.845	47.2588	15.1408	61.7105	1.97623	14.1373	9.15493	-0.217344	2.17648	-1.80623	4.29421	4.49917	7.42681	6.64849	21.4895	24.9955	32.2579	11.6271	9.35884	15.401	8.1496	9.07414	2.74293	5.57155	6.78788	3.95242	-0.0091539	-1.8657	3.56171	12.2996	8.88363	38.0823	24.5912	4.60792	2.03499	26.1357	9.24835	116.604	189.235	72.7438
N2	1847.95	1111.79	2172.36	2796.52	1166.82	4097.84	3649.89	957.84	237.746	471.151	113.958	120.902	913.301	27.0683	40.4988	428.364	559.306	397.81	124.35	69.3033	353.424	105.928	81.9457	185.339	302.385	218.357	156.315	42.842	241.816	452.22	569.144	545.961	575.257	410.362	148.723	34.6521	26.1902	21.7369	23.3191	130.076	632.319	293.959	93.1783	87.3399	257.126	409.87	1859.83	3763.79	2974.65
N2_DCD	575.255	936.46	1225.06	1808.83	850.583	2929.63	801.053	289.309	213.22	315.85	26.8958	5.36135	377.805	43.5305	-9.9834	47.2484	97.6106	101.375	44.0762	42.1322	108.041	61.4998	91.1889	82.8422	232.567	133.512	163.211	13.6832	47.9292	123.277	150.028	187.282	235.516	282.802	110.892	30.3616	36.9802	15.257	13.9857	46.1409	253.335	191.329	57.1343	46.2959	192.769	350.631	1527.32	2088.21	1974.68
N2_BC	466.211	559.265	1962.51	2894.51	852.697	3779.75	1519.31	376.192	47.429	170.216	138.567	28.0829	549.571	34.8101	38.6055	161.369	95.9035	27.4052	12.3573	33.2644	93.8593	38.0092	178.646	181.44	315.475	94.443	129.488	18.5413	171.329	285.511	267.184	164.91	43.2535	60.3699	40.121	7.78215	9.63414	17.8146	5.19191	56.8667	625.837	151.746	52.5574	9.76696	85.3696	378.171	1438.03	2305.35	1888.5
Standard error
	2015-05-04	2015-05-08	2015-05-15	2015-05-19	2015-05-22	2015-05-29	2015-06-02	2015-06-05	2015-06-12	2015-06-17	2015-09-30	2015-10-06	2015-10-09	2015-10-13	2015-10-16	2015-10-20	2015-10-23	2015-10-27	2015-10-30	2015-11-03	2015-11-06	2015-11-10	2015-11-23	2015-12-04	2015-12-08	2015-12-11	2015-12-15	2015-12-18	2015-12-22	2015-12-25	2015-12-30	2016-01-07	2016-01-11	2016-01-14	2016-01-20	2016-01-29	2016-02-02	2016-02-10	2016-02-17	2016-03-16	2016-03-18	2016-03-25	2016-03-29	2016-04-01	2016-04-06	2016-04-08	2016-04-12	2016-04-15	2016-04-21
N0	99.8389	307.161	196.791	87.9453	18.711	539.642	134.195	129.67	22.6315	11.1166	0	0.417552	20.3353	0.371727	4.07159	2.58383	8.74407	2.18588	3.27108	2.81082	1.58484	4.86702	0.600757	8.55382	17.5342	11.932	2.58111	5.7477	4.46002	3.53962	4.60684	0.251198	1.38485	1.29957	3.45508	1.84981	2.02298	3.37077	3.97516	4.27578	7.80075	13.7863	3.86031	3.63126	10.3546	2.03059	31.8176	44.9686	10.1918
N2	261.836	443.753	14.8788	531.151	116.102	1160.65	1480.05	434.24	133.518	148.054	8.01753	27.1632	38.5077	3.02151	1.67426	177.284	259.376	160.214	71.7756	34.6327	186.522	65.1904	18.078	38.8904	10.9059	44.3161	53.9808	20.0242	63.2755	92.0637	84.6836	149.368	94.1286	90.9794	32.5128	6.31677	5.53953	1.19666	4.79189	19.02	119.971	3.70121	4.89023	15.6489	58.2937	1.09164	121.009	597.867	147.823
N2_DCD	168.957	203.28	156.496	221.64	335.641	358.857	241.119	243.581	68.3099	23.8292	8.29747	24.6217	117.173	6.24115	21.6617	5.69723	43.2524	30.4198	8.47671	19.1846	27.9828	11.9562	34.2581	19.4096	48.1608	52.326	27.542	2.13696	6.45319	11.1878	44.0141	32.3329	104.026	122.414	39.0482	15.3423	9.37551	7.51638	5.14155	8.97024	61.0279	12.8543	7.56827	8.67481	7.53331	54.1114	7.31347	702.857	165.876
N2_BC	129.421	257.445	178.625	495.448	174.507	746.803	471.489	221.795	23.623	71.3184	14.8621	11.3354	202.928	7.72688	39.9226	38.0266	42.383	11.886	5.81078	17.6456	36.8145	22.6342	108.057	23.0419	63.9112	1.68274	43.6338	7.18619	36.7975	183.93	118.993	73.4225	11.6355	18.0486	17.5084	3.35939	3.39448	3.29102	1.5451	0.720042	56.1001	67.2743	16.3633	3.12268	11.5399	123.378	90.5863	500.646	233.606
[truncated: 7 more columns]
