# Supplementary material for: Effects of nitrogen application rate, nitrogen synergist and biochar on nitrous oxide emissions from vegetable field in south China
Source: PLoS One. 2017 Apr 18;12(4):e0175325. doi: 10.1371/journal.pone.0175325 (PMC5395173; doi:10.1371/journal.pone.0175325)
Supplement: S5 Fig — (XLSX) [file pone.0175325.s005.xlsx]

## Sheet: cumulative N2O
Cumulative N2O emisssion
Endive												Standard error
	2015-05-04	2015-05-08	2015-05-15	2015-05-19	2015-05-22	2015-05-29	2015-06-02	2015-06-05	2015-06-12	2015-06-17		2015-05-04	2015-05-08	2015-05-15	2015-05-19	2015-05-22	2015-05-29	2015-06-02	2015-06-05	2015-06-12	2015-06-17
N0	0.0917526	0.701085	1.72614	2.01748	2.15938	3.5141	4.13343	4.26799	4.41384	4.48254		0.0239613	0.221818	0.522769	0.565564	0.563848	0.797274	0.933414	0.970643	1.04367	1.04561
N2	0.443509	1.77585	4.6618	7.12176	8.353	13.127	16.7922	18.1279	19.0458	19.4992		0.044435	0.163924	0.38109	0.541912	0.661194	0.709853	0.220228	0.413183	0.591083	0.443623
N2_DCD	0.138061	0.907029	2.75734	4.28365	5.12605	8.55091	10.0862	10.4173	10.8303	11.1601		0.0405498	0.193311	0.478103	0.665984	0.559946	0.625818	0.87604	1.03295	1.21353	1.23658
N2_BC	0.111891	0.615285	2.90196	5.34517	6.44915	10.6916	12.9639	13.5092	13.8255	13.9709		0.0219634	0.0543162	0.0473168	0.283083	0.449667	0.713244	0.705715	0.674545	0.761627	0.735773
Lettuce															Standard error
	2015-09-30	2015-10-06	2015-10-09	2015-10-13	2015-10-16	2015-10-20	2015-10-23	2015-10-27	2015-10-30	2015-11-03	2015-11-06	2015-11-10	2015-11-23		2015-09-30	2015-10-06	2015-10-09	2015-10-13	2015-10-16	2015-10-20	2015-10-23	2015-10-27	2015-10-30	2015-11-03	2015-11-06	2015-11-10	2015-11-23
N0	0.0113421	0.0524157	0.0856705	0.109072	0.116332	0.126915	0.13508	0.143143	0.144259	0.146198	0.150719	0.157911	0.179776		0	0.000248014	0.00994395	0.0172376	0.0163892	0.017242	0.014445	0.0118056	0.0102326	0.0107278	0.0117148	0.0148828	0.0218869
N2	0.02735	0.197283	0.664683	1.00971	1.03565	1.30725	1.67852	2.11856	2.27372	2.36007	2.54634	2.73713	3.02734		0.00136062	0.0208963	0.112392	0.21274	0.21423	0.238195	0.346413	0.515212	0.579621	0.617438	0.707151	0.801932	0.869789
N2_DCD	0.006455	0.027096	0.209729	0.371857	0.377512	0.402268	0.46046	0.556425	0.601911	0.643058	0.70503	0.820318	1.15686		0.00140813	0.019553	0.0767694	0.116773	0.125931	0.135434	0.12393	0.0968357	0.0867444	0.0888424	0.0871029	0.0530285	0.092204
N2_BC	0.033256	0.139986	0.410519	0.629251	0.656136	0.766855	0.851617	0.902586	0.915094	0.939502	0.992538	1.04913	1.40399		0.00252218	0.00209476	0.0687907	0.120051	0.103709	0.0838059	0.0828605	0.0830278	0.0825914	0.0904231	0.102182	0.121844	0.0349905
Cabbage																		Standard error
	2015-12-04	2015-12-08	2015-12-11	2015-12-15	2015-12-18	2015-12-22	2015-12-25	2015-12-30	2016-01-07	2016-01-11	2016-01-14	2016-01-20	2016-01-29	2016-02-02	2016-02-10	2016-02-17		2015-12-04	2015-12-08	2015-12-11	2015-12-15	2015-12-18	2015-12-22	2015-12-25	2015-12-30	2016-01-07	2016-01-11	2016-01-14	2016-01-20	2016-01-29	2016-02-02	2016-02-10	2016-02-17
N0	0.00431938	0.0187863	0.0337609	0.0485835	0.0569312	0.0707848	0.0788719	0.0909191	0.102953	0.107813	0.112907	0.12067	0.124912	0.124327	0.127166	0.14281		0.000838099	0.00504701	0.00864469	0.0106037	0.0108422	0.0129431	0.0148982	0.0183556	0.0213766	0.0216934	0.0213291	0.0187984	0.0145587	0.0148436	0.0137231	0.014991
N2	0.0406708	0.280091	0.451144	0.600312	0.644246	0.815079	1.06759	1.64092	2.61374	3.13349	3.44152	3.77891	3.96176	3.98728	4.02967	4.07077		0.00381047	0.0092763	0.0165254	0.0253825	0.0295842	0.0462615	0.0541445	0.0618266	0.130314	0.177406	0.210704	0.252447	0.264963	0.264176	0.264646	0.263494
N2_DCD	0.0179804	0.190148	0.328091	0.484454	0.530068	0.561518	0.629522	0.779582	1.08979	1.29853	1.49079	1.75363	1.88524	1.91148	1.95413	1.98176		0.00190175	0.0317432	0.0520656	0.075322	0.0824944	0.0830466	0.0876371	0.113167	0.113687	0.149559	0.208733	0.283843	0.317777	0.322126	0.330816	0.3356
N2_BC	0.0412879	0.303838	0.429418	0.524464	0.557738	0.679098	0.906129	1.27965	1.68612	1.76858	1.80584	1.87521	1.92134	1.93063	1.95967	1.97843		0.00225764	0.0296215	0.0429676	0.0502078	0.0570806	0.0722412	0.0304318	0.110112	0.254398	0.283167	0.292758	0.313676	0.322254	0.322263	0.326104	0.328267
Sweet corn																			Standard error
	2016-03-16	2016-03-18	2016-03-25	2016-03-29	2016-04-01	2016-04-06	2016-04-08	2016-04-12	2016-04-15	2016-04-21	2016-04-25	2016-04-29	2016-05-04	2016-05-12	2016-05-17	2016-05-24	2016-05-31		2016-03-16	2016-03-18	2016-03-25	2016-03-29	2016-04-01	2016-04-06	2016-04-08	2016-04-12	2016-04-15	2016-04-21	2016-04-25	2016-04-29	2016-05-04	2016-05-12	2016-05-17	2016-05-24	2016-05-31
N0	0.00213207	0.0169077	0.0679346	0.0795521	0.0816348	0.101429	0.107895	0.181187	0.300004	0.47465	0.558822	0.639432	0.691895	0.725826	0.746636	0.76423	0.772764		0.00102619	0.00328527	0.00546146	0.0121443	0.0146657	0.018549	0.019402	0.0366718	0.0654941	0.0951857	0.120972	0.176265	0.216178	0.224291	0.225284	0.227964	0.228768
N2	0.0312182	0.274462	1.01193	1.17367	1.23795	1.46501	1.64341	2.90687	5.15985	9.91683	14.8817	20.155	24.6832	31.1876	33.7997	34.8218	36.2177		0.00456481	0.040416	0.12899	0.130914	0.133336	0.171182	0.177179	0.196031	0.274385	0.481141	0.635745	0.715742	0.878052	0.938441	0.850535	0.888362	1.11526
N2_DCD	0.0110738	0.107811	0.473889	0.577048	0.612982	0.773998	0.923357	1.96598	3.33488	6.24653	9.47092	13.0344	16.1377	21.2192	23.684	24.8754	26.919		0.00215286	0.0249207	0.0564956	0.0562537	0.0539653	0.0542635	0.0358094	0.0184005	0.318512	0.649766	0.739287	0.933893	1.10152	1.40802	1.56337	1.62316	1.64917
N2_BC	0.013648	0.245773	0.842052	0.928214	0.945516	1.01167	1.15806	2.15702	3.60871	6.57826	9.37542	13.1148	15.9186	18.2905	19.1183	19.3549	20.0972		0.00017281	0.0199862	0.0769206	0.104067	0.108043	0.116085	0.138967	0.200554	0.360044	0.654306	0.677408	0.886388	0.949039	1.13866	1.48628	1.59223	1.74691
