# Supplementary material for: Effects of nitrogen application rate, nitrogen synergist and biochar on nitrous oxide emissions from vegetable field in south China
Source: PLoS One. 2017 Apr 18;12(4):e0175325. doi: 10.1371/journal.pone.0175325 (PMC5395173; doi:10.1371/journal.pone.0175325)
Supplement: S6 Fig — (XLSX) [file pone.0175325.s006.xlsx]

## Sheet: Yield scaled N2O emission
Yield scaled N2O emission
						Standard error
	N0	N1	N2	N3		N0	N1	N2	N3
Endive	368.073	383.26	583.944	593.569		21.9209	14.981	37.0683	33.0319
Lettuce	8.1562	31.0497	78.3308	206.502		0.474023	6.68775	23.9257	36.4111
Cabbage	13.8878	26.2897	52.2277	101.044		3.16589	2.27955	3.71765	3.67386
Sweet corn	77.1212	336.189	386.871	570.16		20.7616	14.7792	8.20926	19.3067
