# Supplementary material for: Effects of nitrogen application rate, nitrogen synergist and biochar on nitrous oxide emissions from vegetable field in south China
Source: PLoS One. 2017 Apr 18;12(4):e0175325. doi: 10.1371/journal.pone.0175325 (PMC5395173; doi:10.1371/journal.pone.0175325)
Supplement: S7 Fig — (XLSX) [file pone.0175325.s007.xlsx]

## Sheet: Sheet1
Yield scaled N2O emission
						Standard error
	N0	N2	N2_DCD	N2_BC		N0	N2	N2_DCD	N2_BC
Endive	368.073	583.944	303.051	337.512		21.9209	37.0683	27.625	9.52785
Lettuce	8.1562	78.3308	30.2412	33.8633		0.474023	23.9257	2.59519	1.50022
Cabbage	13.8878	52.2277	22.7422	23.5312		3.16589	3.71765	4.1999	4.8805
Sweet corn	77.1212	386.871	318.802	275.741		20.7616	8.20926	5.57487	21.0035
