# Supplementary material for: Effects of nitrogen application rate, nitrogen synergist and biochar on nitrous oxide emissions from vegetable field in south China
Source: PLoS One. 2017 Apr 18;12(4):e0175325. doi: 10.1371/journal.pone.0175325 (PMC5395173; doi:10.1371/journal.pone.0175325)
Supplement: S8 Fig — (XLSX) [file pone.0175325.s008.xlsx]

## Sheet: 相关分析
	N rate (kg hm-2)	N2O emission (kg N hm-2)
Endive	0	4.48254
	90	10.7768
	180	19.4992
	270	23.387
Lettuce	0	0.179776
	75	1.19987
	150	3.02734
	225	7.18676
Cabbage	0	0.152124
	90	1.5161
	180	4.37462
	270	9.61521
Sweet corn	0	0.772764
	180	18.855
	360	36.2177
	540	49.4989
	N rate (kg hm-2)	Nmin (kg hm-2)
Endive	0	8.6743
	90	9.59599
	180	20.5252
	270	23.8484
Lettuce	0	7.68143
	75	24.2714
	150	101.336
	225	154.334
Cabbage	0	3.93428
	90	3.81279
	180	4.80273
	270	10.047
Sweet corn	0	1.10287
	180	30.8887
	360	121.163
	540	240.395
