# Supplementary material for: Effects of nitrogen application rate, nitrogen synergist and biochar on nitrous oxide emissions from vegetable field in south China
Source: PLoS One. 2017 Apr 18;12(4):e0175325. doi: 10.1371/journal.pone.0175325 (PMC5395173; doi:10.1371/journal.pone.0175325)
Supplement: S9 Fig — (XLSX) [file pone.0175325.s009.xlsx]

## Sheet: Sheet1
NH4+-N (mg kg-1)
Date	N0	N1	N2	N3
2015-04-29	4.83464	4.83464	4.83464	4.83464
2015-05-08	12.4298	10.0741	9.17677	20.3217
2015-05-19	9.20626	13.4702	65.037	28.7858
2015-05-29	1.47938	2.60827	2.64934	9.61294
2015-06-12	9.16272	10.2737	10.2869	8.77354
2015-06-17	6.05184	6.50325	6.16368	6.54135
2015-10-08	4.84649	7.16498	20.2123	50.4558
2015-11-16	0.376567	0.618833	4.29233	10.1515
2015-12-22	9.43495	16.2911	75.4404	76.0097
2016-01-07	6.97704	10.2501	30.1394	37.2988
2016-01-27	4.10705	3.2181	2.81898	8.6226
2016-02-23	3.24062	2.59304	3.31403	3.33564
2016-03-18	3.61675	11.1506	26.8609	45.5076
2016-03-29	1.95097	1.73317	1.89313	3.83015
2016-04-08	5.35844	101.064	248.8	264.106
2016-04-15	10.3444	39.5702	45.8124	154.399
2016-04-25	0.459149	20.8801	87.3418	212.827
2016-05-04	0	0.25052	49.1571	121.483
2016-05-24	0.690176	0.0610314	8.85214	2.58466
2016-06-02	0	0.25052	49.1571	121.483
WFPS
Date	WFPS(%)
2015-04-29	53.0411
2015-05-08	44.8869
2015-05-19	43.9343
2015-05-29	42.0186
2015-06-12	43.1849
2015-06-17	34.7992
2015-10-08	41.1366
2015-11-16	41.907
2015-12-22	34.4946
2016-01-07	42.8276
2016-01-27	49.1169
2016-02-23	40.3926
2016-03-18	46.9141
2016-03-29	38.782
2016-04-08	41.0636
2016-04-15	46.3039
2016-04-25	44.4675
2016-05-04	44.0059
2016-05-24	37.3188
2016-06-02	35.7515
